# Supplementary material for: SHF Acts as a Novel Tumor Suppressor in Glioblastoma Multiforme by Disrupting STAT3 Dimerization
Source: PubMed Central journal article supplement (PMC9475553; doi:10.1002/advs.202200169), 2022-07-17

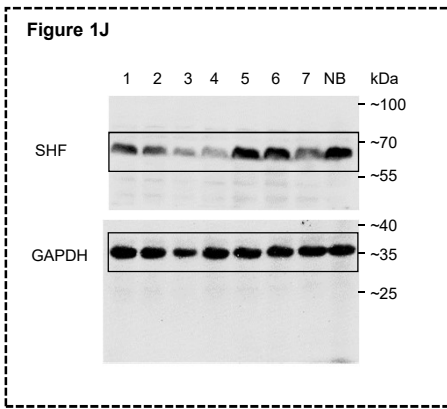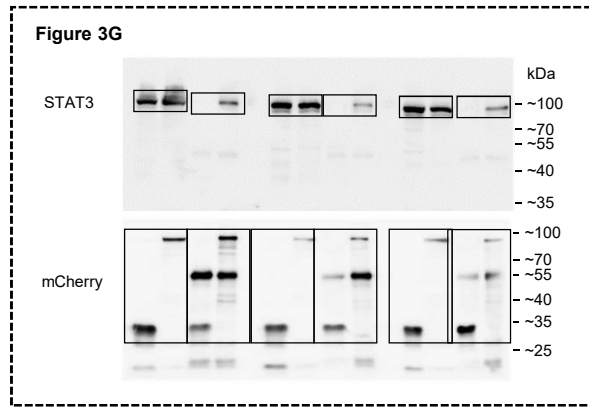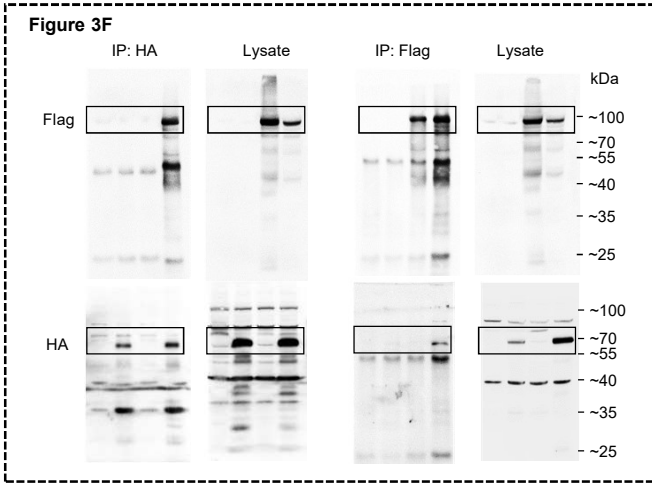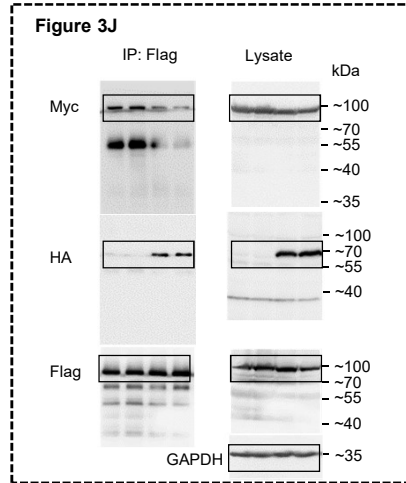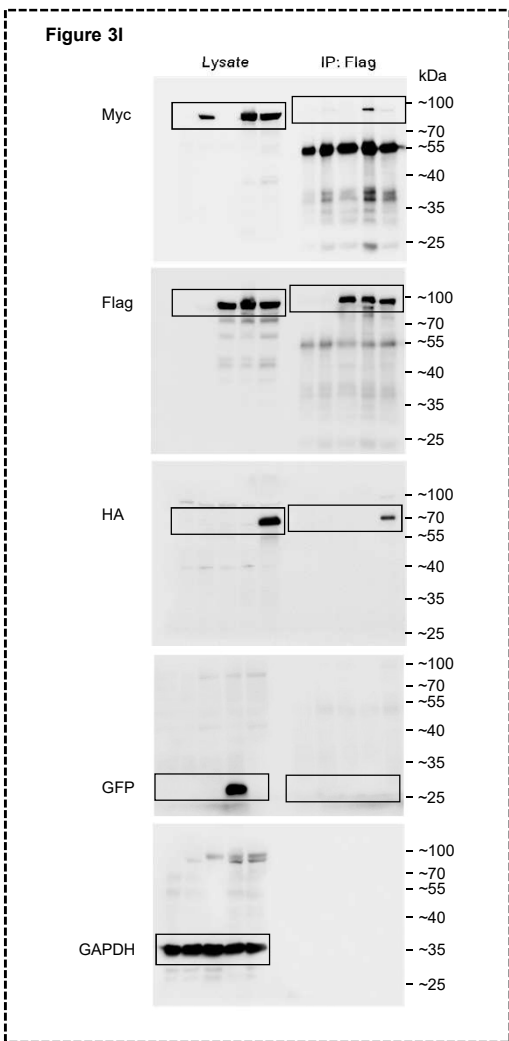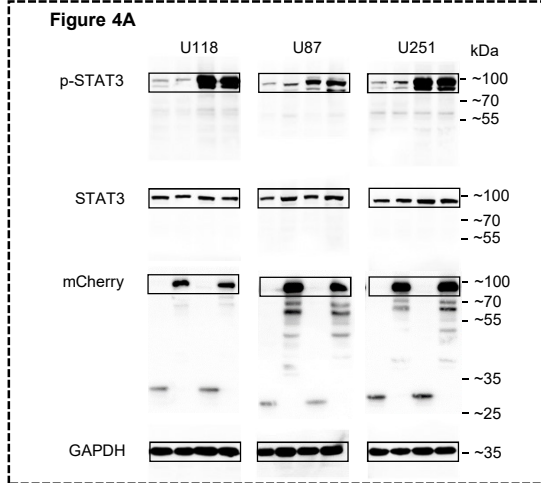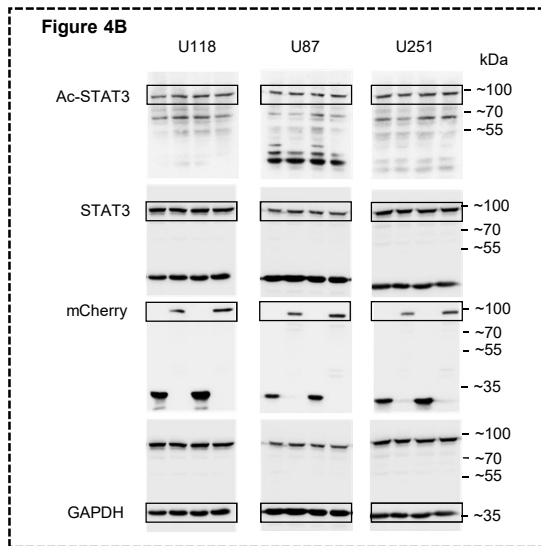

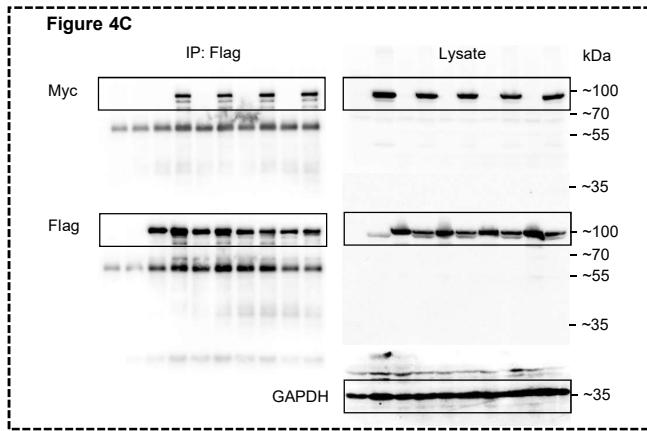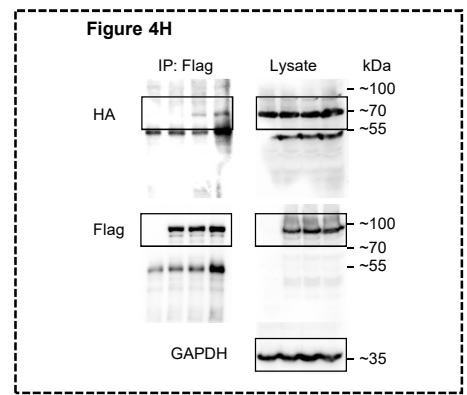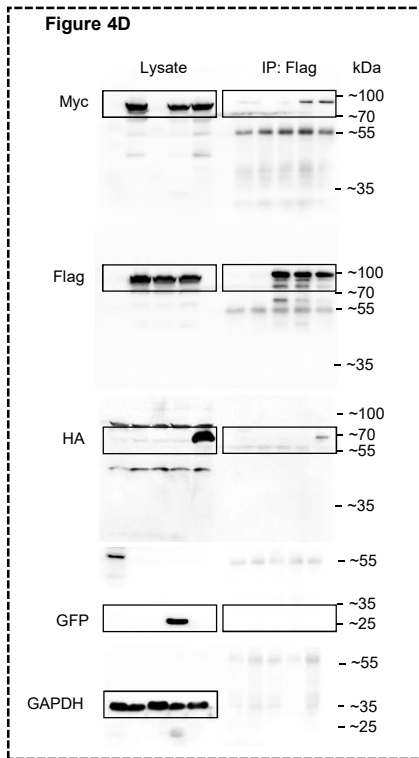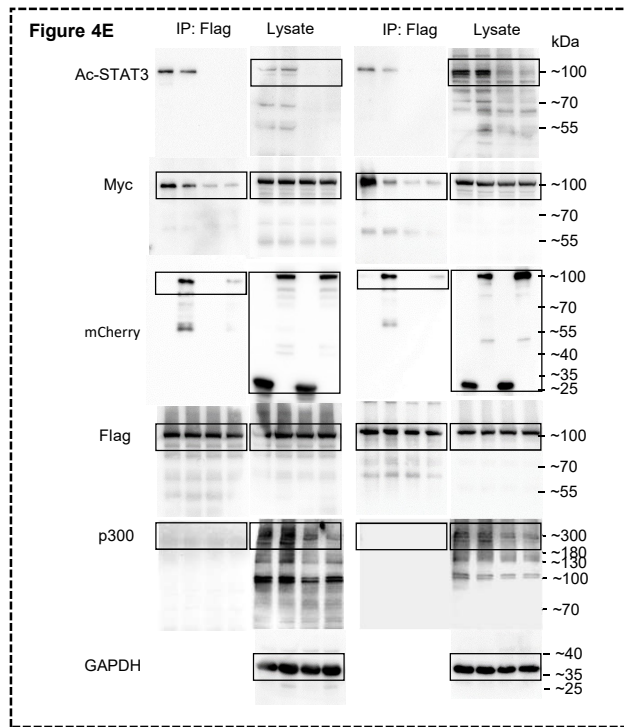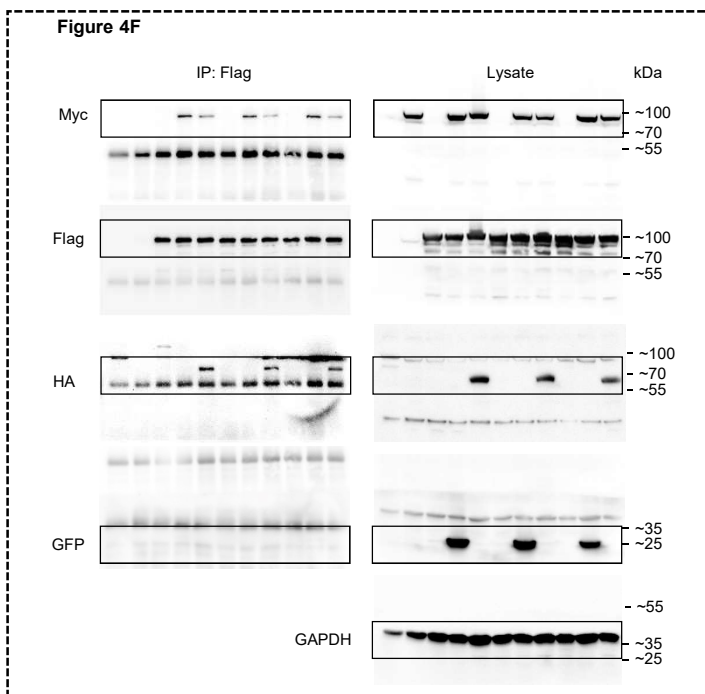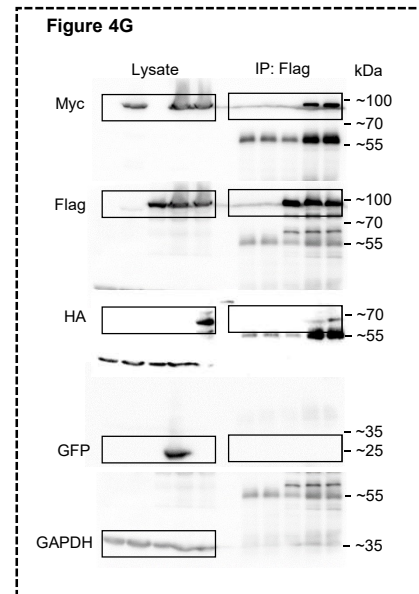

**Figure 5A**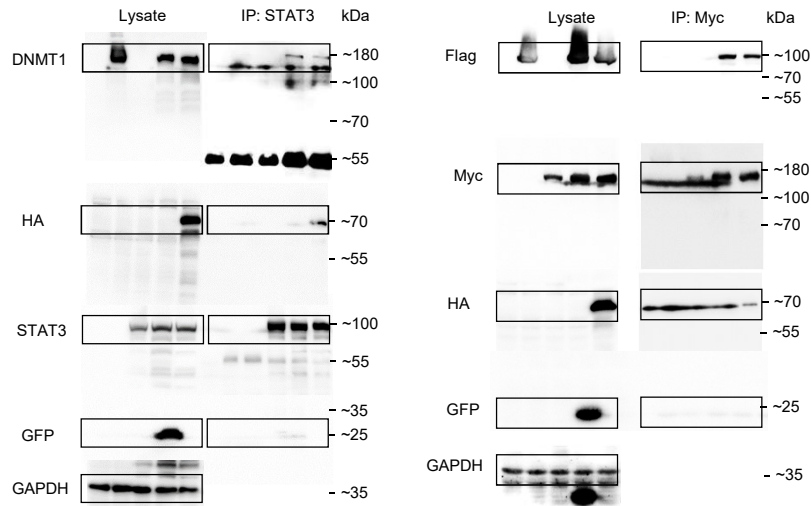**Figure 6B**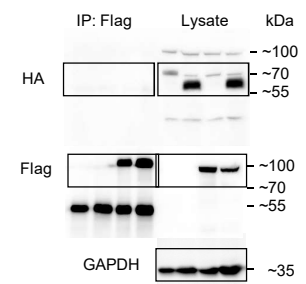**Figure 6C**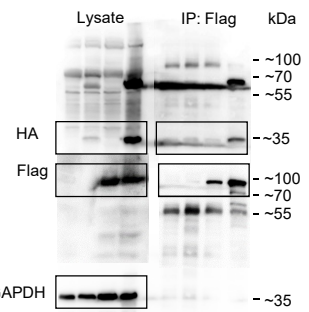**Figure 5B**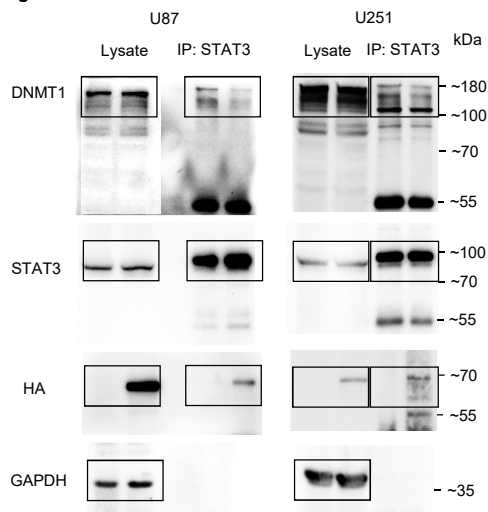**Figure 6D**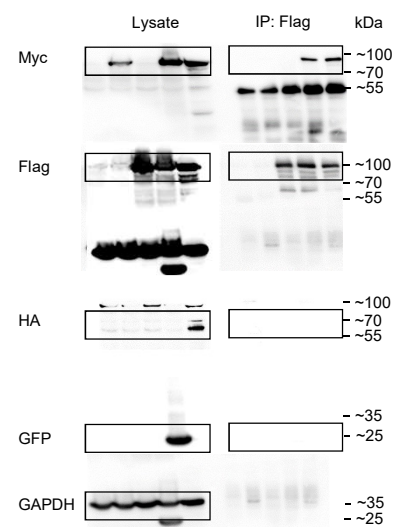**Figure 6E**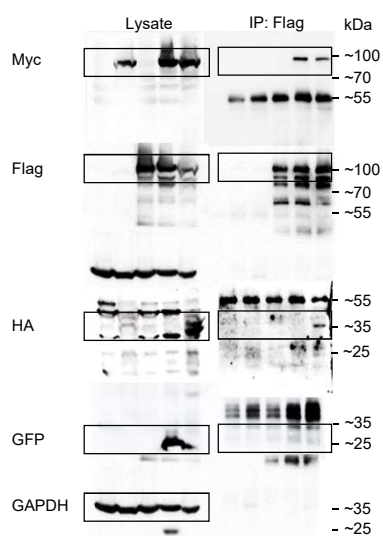

**Figure 6G**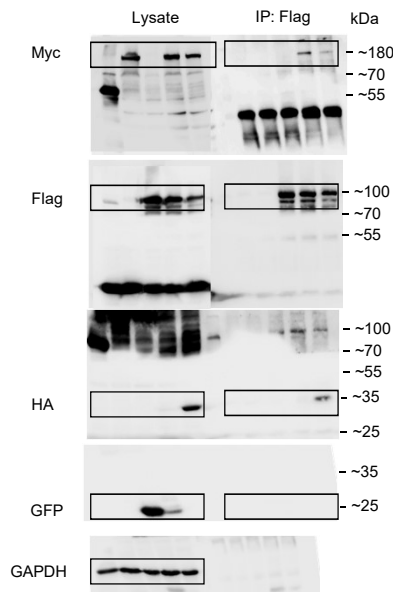**Figure 7E**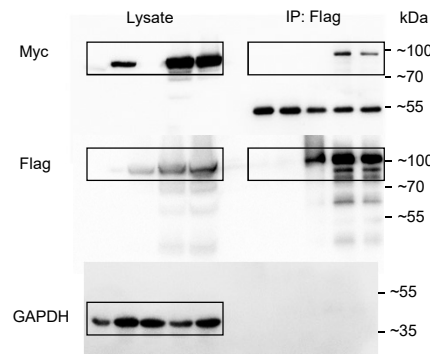**Figure 7G**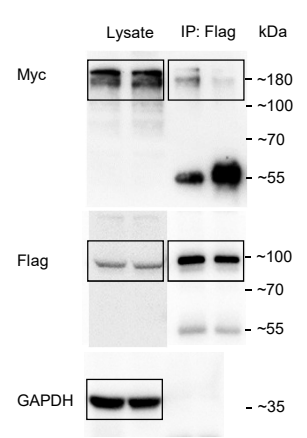**Figure 7D**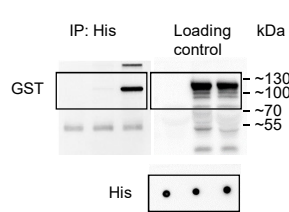**Figure 7F**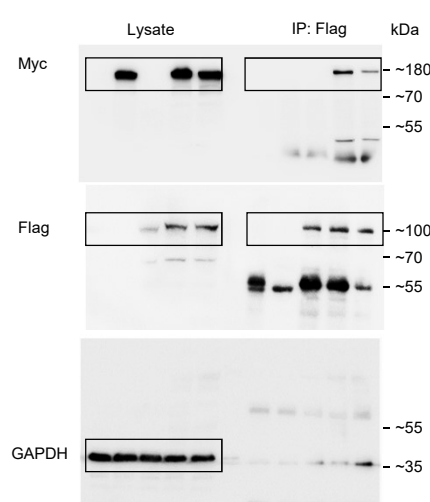**S Figure 1A**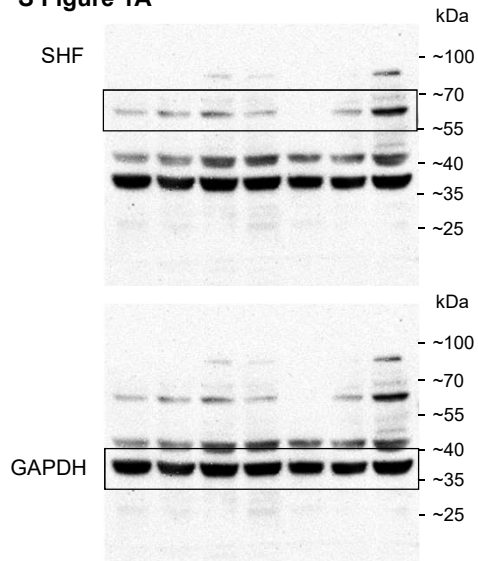**S Figure 1B**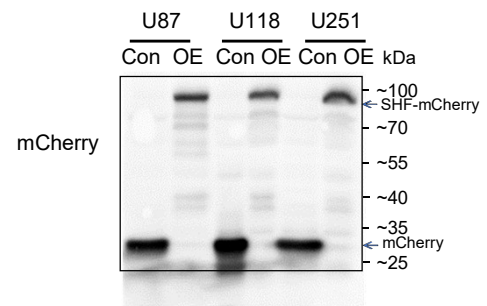

**S Figure 2C**

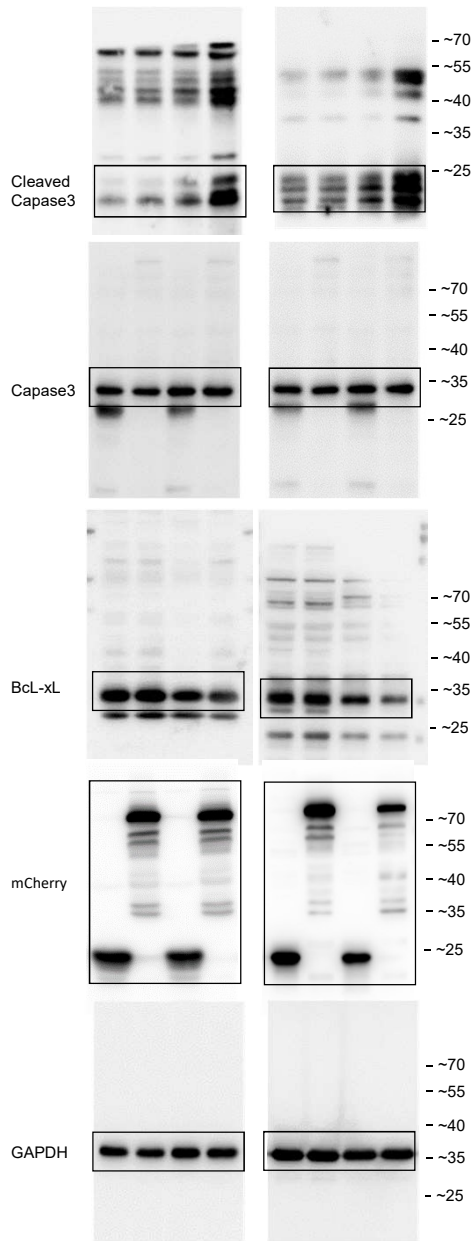

**S Figure 4A**

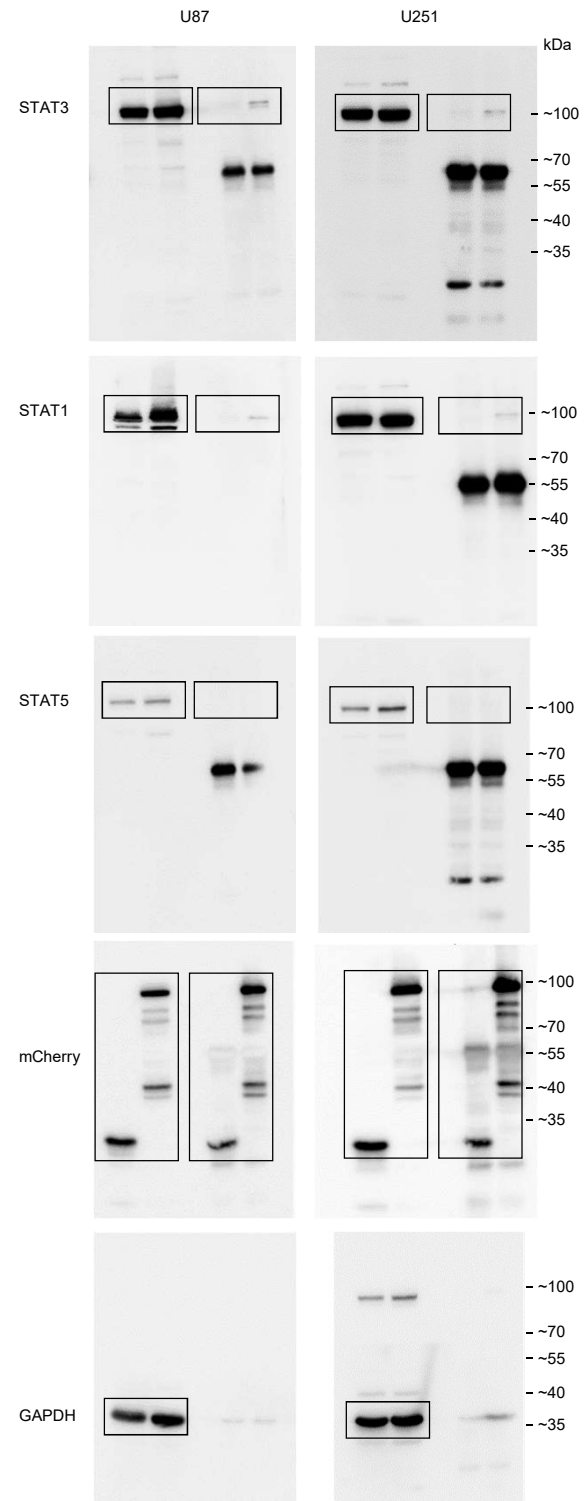

**S Figure 4B**

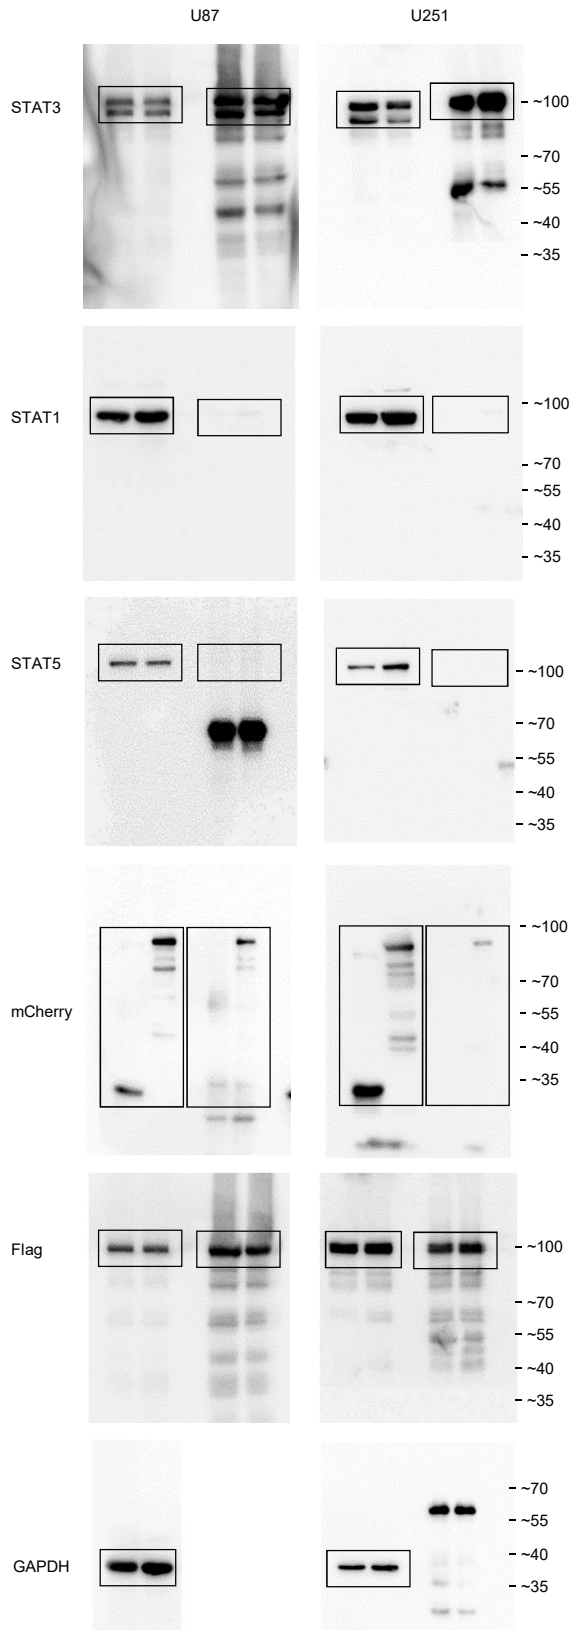

**S Figure 5A**

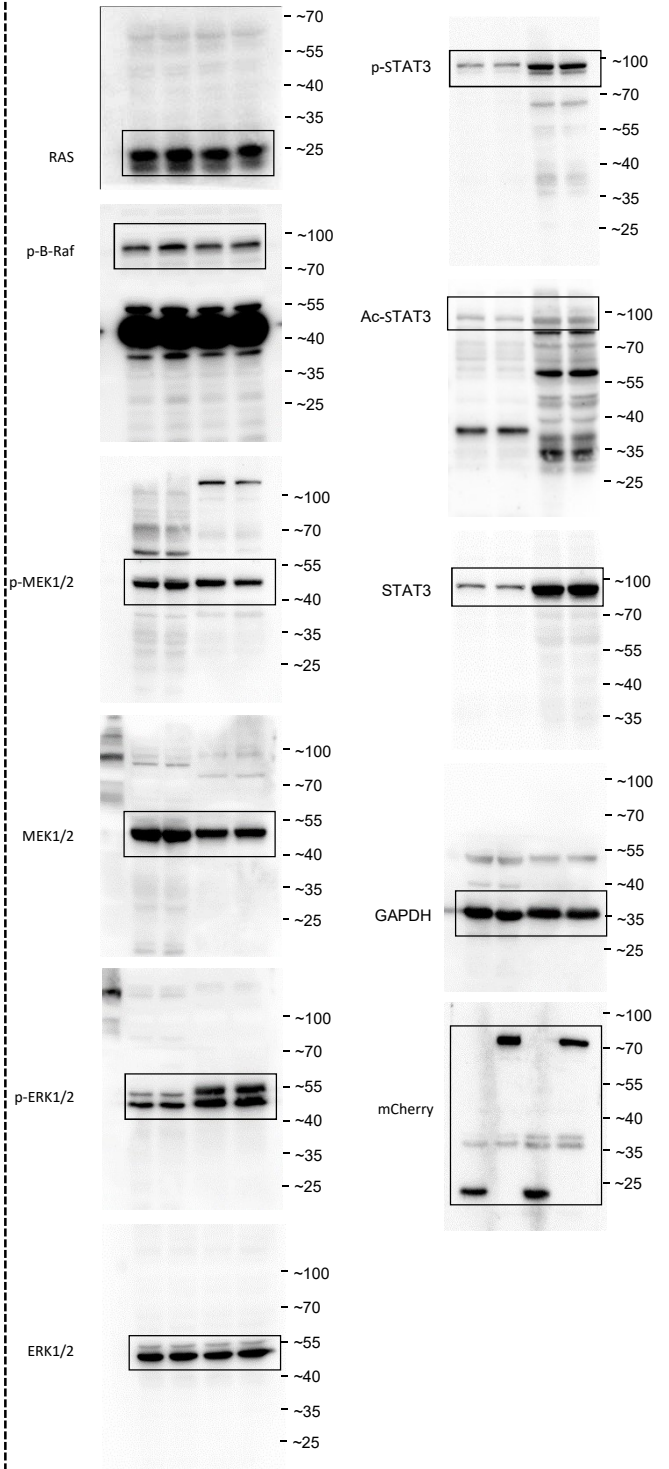

**S Figure 5B**

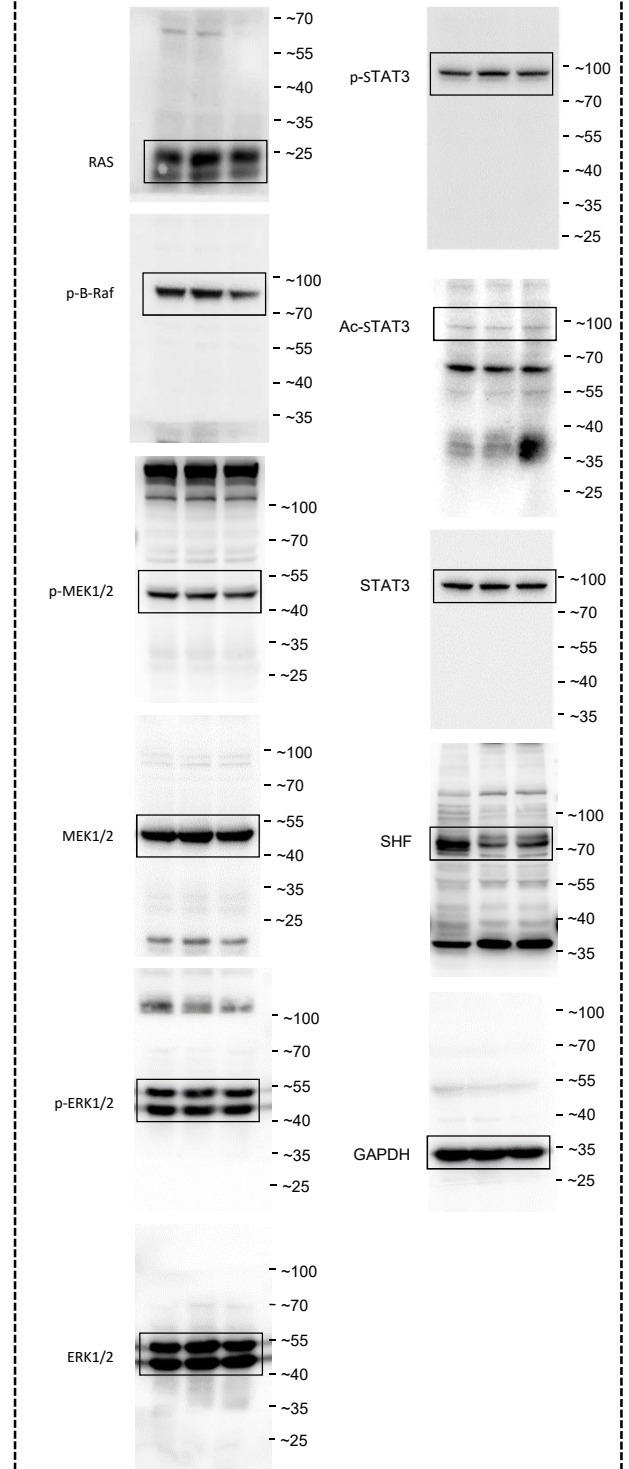

Supplement: ADVS-9-2200169-s004.pdf [file ADVS-9-2200169-s004.pdf]
