# Supplementary material for: SHF Acts as a Novel Tumor Suppressor in Glioblastoma Multiforme by Disrupting STAT3 Dimerization
Source: PubMed Central journal article supplement (PMC9475553; doi:10.1002/advs.202200169), 2022-07-17
Supplement: ADVS-9-2200169-s010.pdf [file ADVS-9-2200169-s010.pdf]

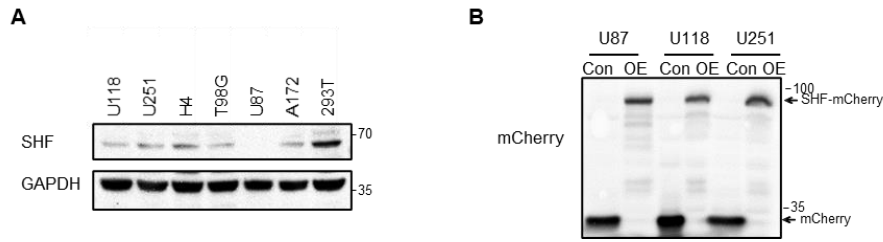

**Supplementary Fig. 1 SHF expression in GBM cell lines and stable expressing cell lines.**

- A.** Western blot assay of SHF expression in indicated GBM cell lines and 293T.  
**B.** Western blot assay of ectopic SHF expression in stable expressing cell lines.

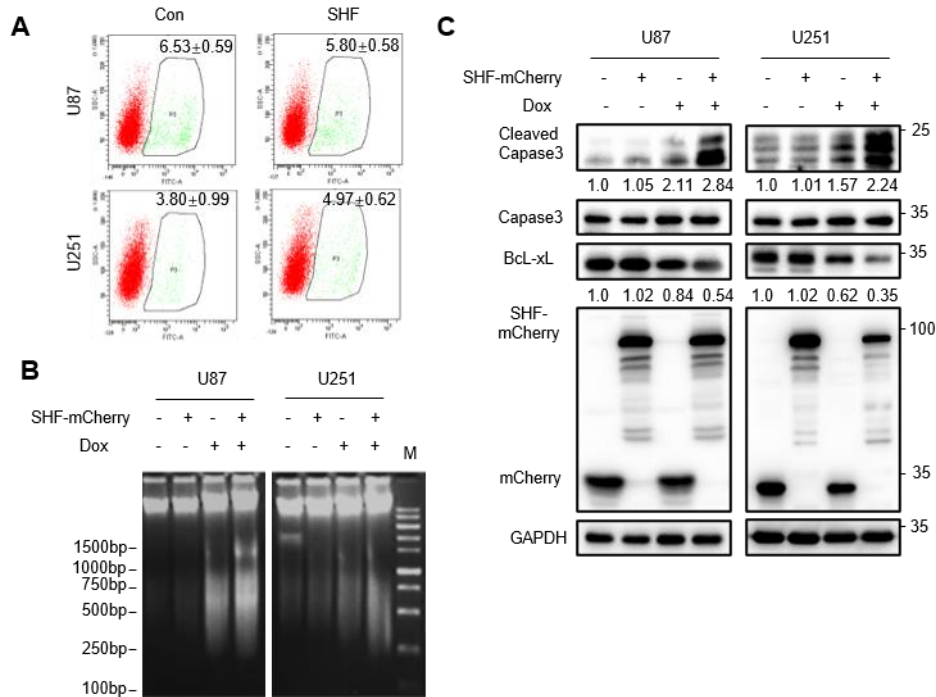

**Supplementary Fig. 2 SHF expression enhances cellular apoptosis induced by DOX in GBM cells.**

- A.** Flow cytometry assay of cells under normal culture conditions using Annexin V. The percentage of apoptosis was indicated (n=4).  
**B.** Chromosomal DNA fragmentation analysis of cells treated with Dox (2  $\mu$ M) for 48 h.  
**C.** Western blot analysis of Caspase-3, Cleaved Capase-3, and Bcl-xL using the indicated antibodies. The relative quantification of the indicated proteins was listed.

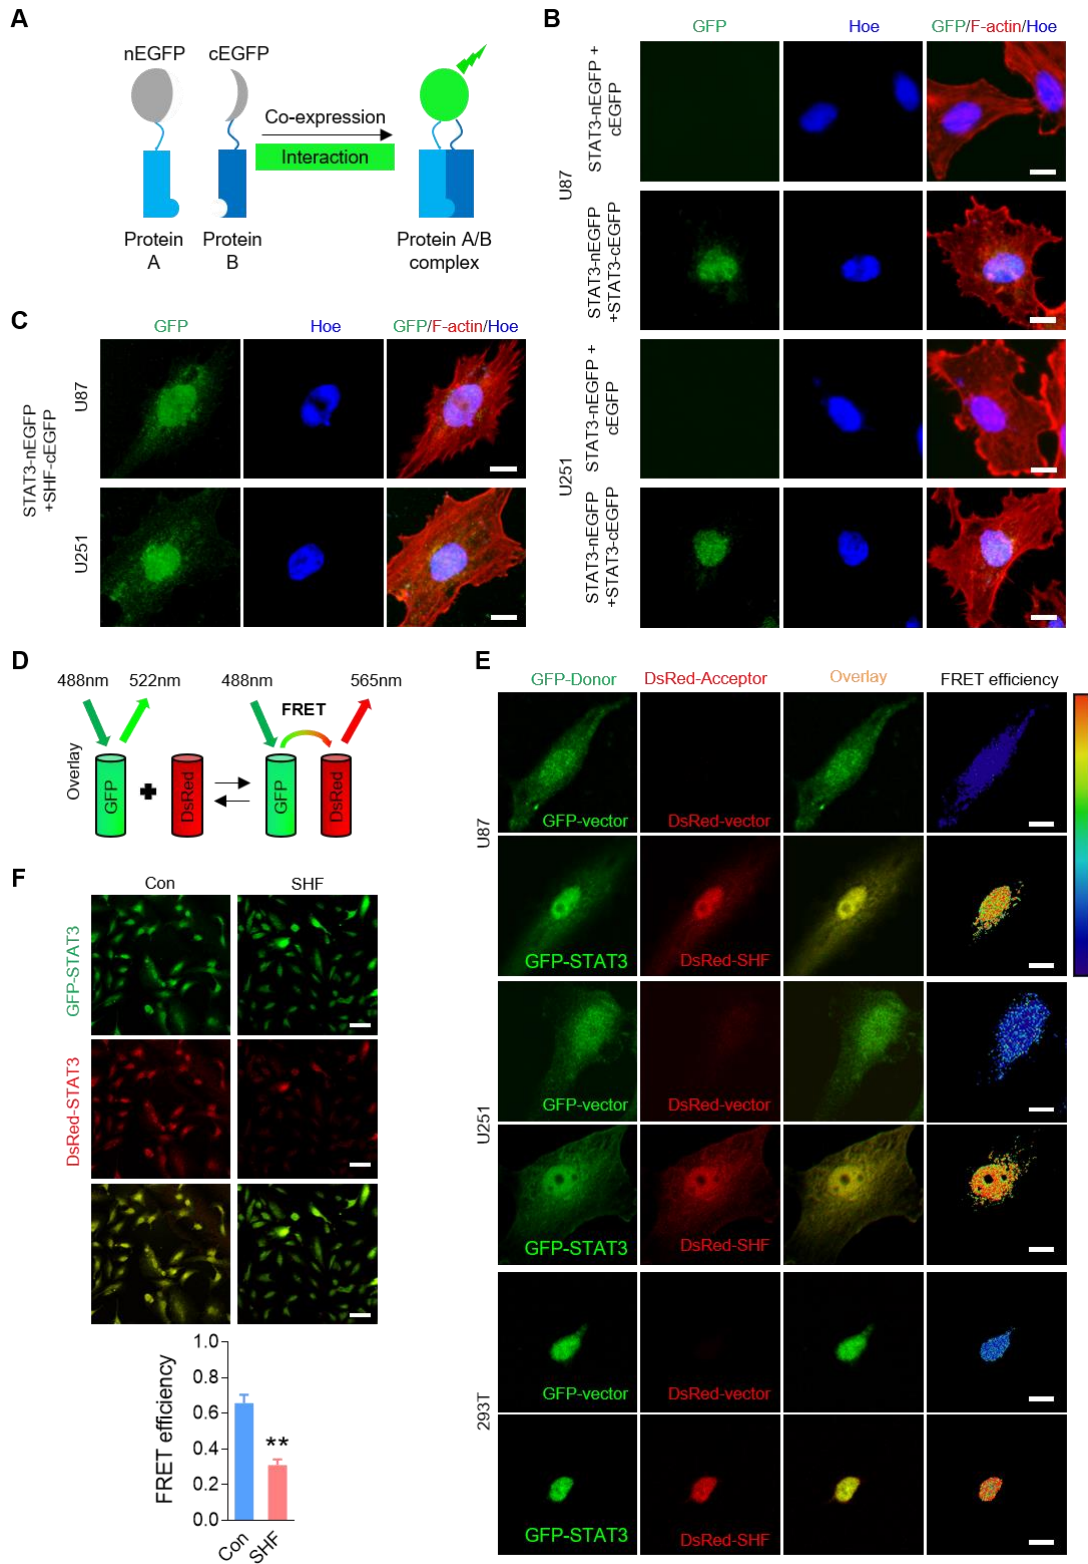

**Supplementary Fig. 3 BiFC and FRET assay of the binding between SHF and STAT3.**

**A.** Diagram indicating the BiFC assay for detection of SHF-STAT3 interaction.

**B,C.** Representative images of GBM cells transiently transfected with the indicated vectors for 16 h. Bars, 10  $\mu$ m.

**D.** Diagram indicating the FRET assay for detection of SHF-STAT3 interaction.

**E.** Representative images of GBM cells and 293T cells transiently transfected with GFP-STAT3 and DsRed-SHF (or GFP-vector and DsRed-vector as negative control) for 24 h. Cells were excited at GFP-specific excitation wavelength (488 nm). The FRET ratios were calculated by reporting emission intensity of DsRed, measured at 565 nm, to the GFP emission peak measured at 522 nm. The pseudocolored ratio images (FRET images) represent the emission changes between negative control (GFP-vector and DsRed-vector) and STAT3-SHF interaction. The colorscale (top right) indicates that a shift toward the red end of the spectrum, which corresponds to higher FRET efficiency. Bars, 10  $\mu$ m.

**F.** Quantitative analysis of normalized FRET ratio in U251 stable cells transiently transfected with GFP-STAT3 and DsRed-STAT3 for 24 h ( $n=3$ ,  $**p < 0.01$ ). U251 cells expressing ectopic SHF showed a significantly lower 565/522 ratio compared with control cells. Bars, 50  $\mu$ m.

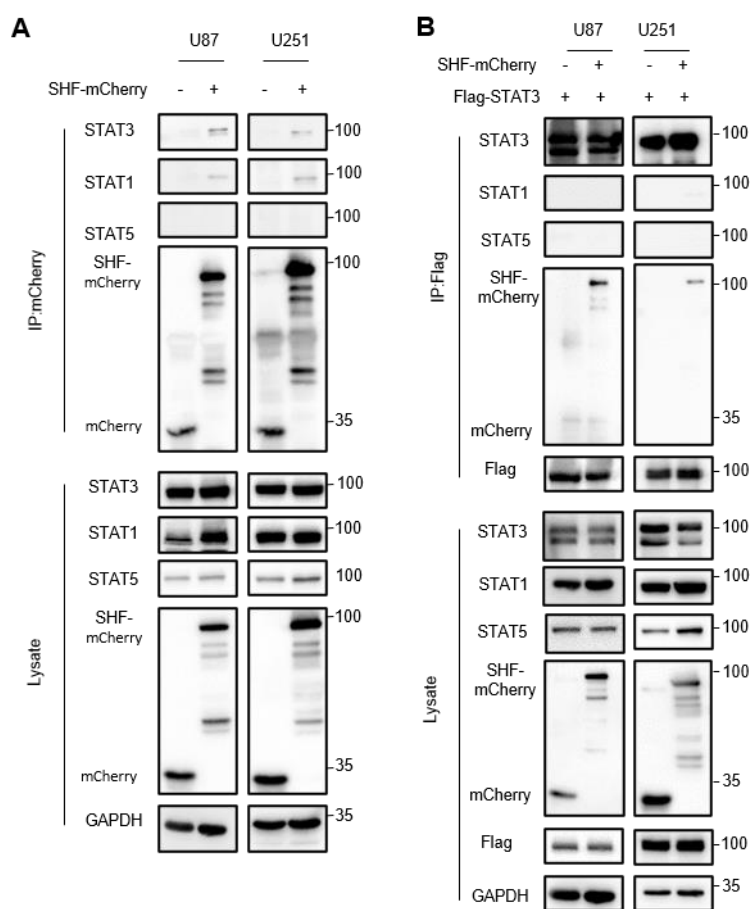

**Supplementary Fig. 4 SHF has no effect on the interaction between STAT3 and STAT1 or STAT5.**

**A.** IP analysis showing the interaction between SHF and STAT1/ STAT3 but not STAT5 in the indicated cells expressing ectopic SHF.

**B.** IP analysis indicating the effect of SHF on the interaction between STAT3 and STAT1 or STAT5. Indicated cells were analyzed by IP using STAT3 antibody.

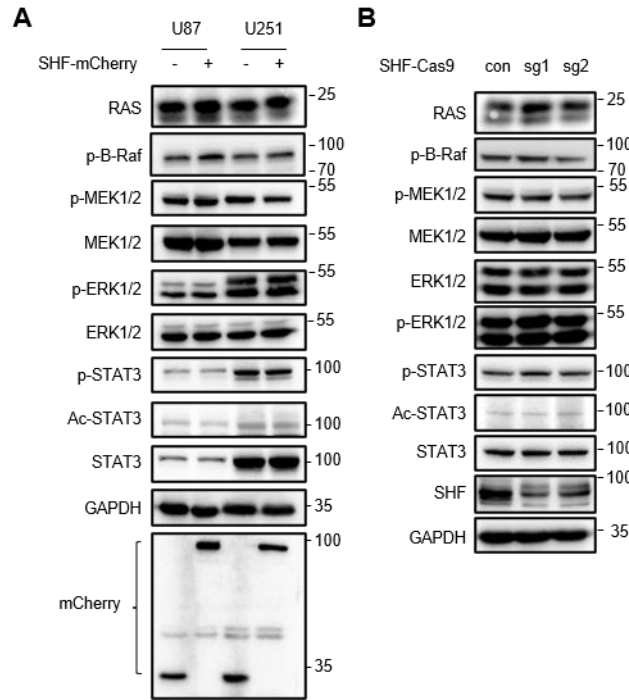

**Supplementary Fig. 5** Western blot analysis of RAS/RAF/MEK signaling pathway in GBM cells expressing ectopic SHF (A) or with CRISPR/Cas9 mediated SHF knockdown (B) using the indicated antibodies.

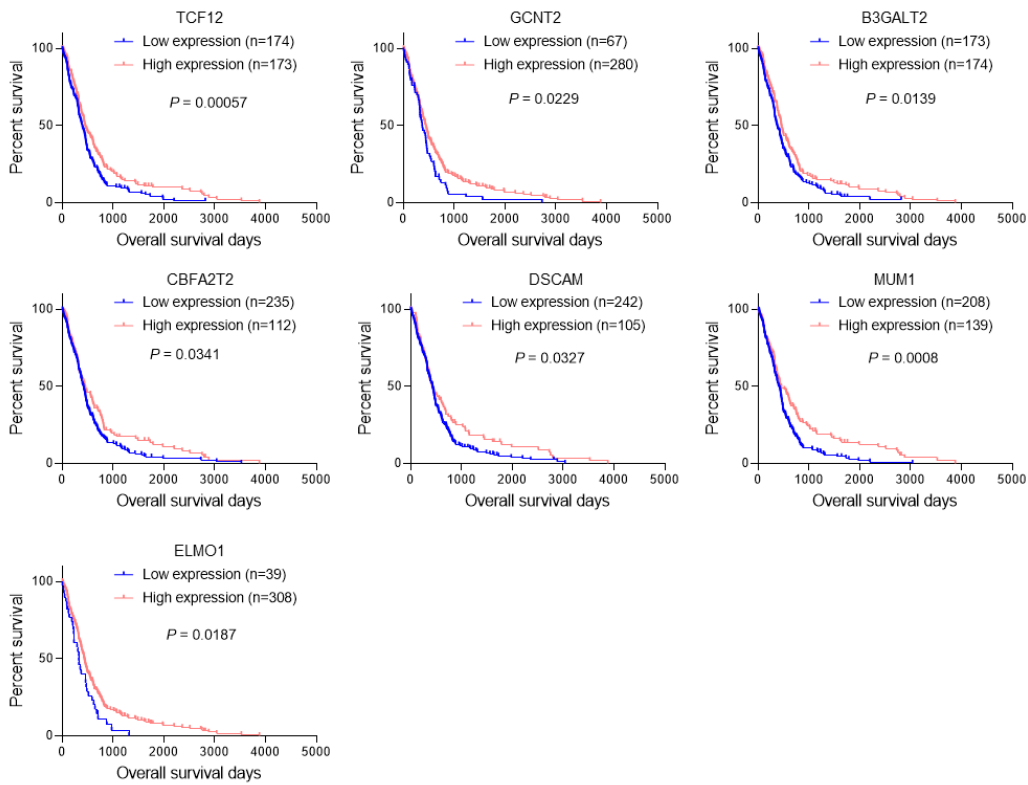

**Supplementary Fig. 6** Overall survival analysis based on the indicated mRNA expression in the TCGA-GBM Affy Exon 1.0 ST dataset (Kaplan–Meier survival test).

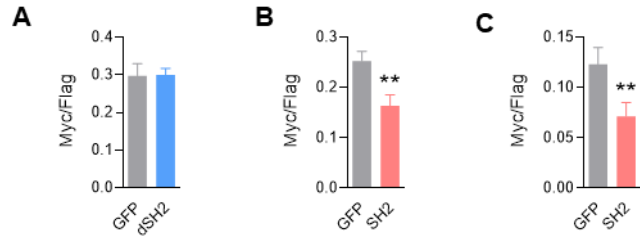

**Supplementary Fig. 7 STAT3 dimerization and STAT3/DNMT interaction.**

- A. The effect of HA-dSH2 on the dimerization of STAT3 (n=3, Student's t test).
- B. SH2 disrupts the dimerization of STAT3 (n=3, Student's t test, \*\*P < 0.01).
- C. SH2 disrupts the interaction between STAT3 and DNMT1 (n=3, Student's t test, \*\*P < 0.01).

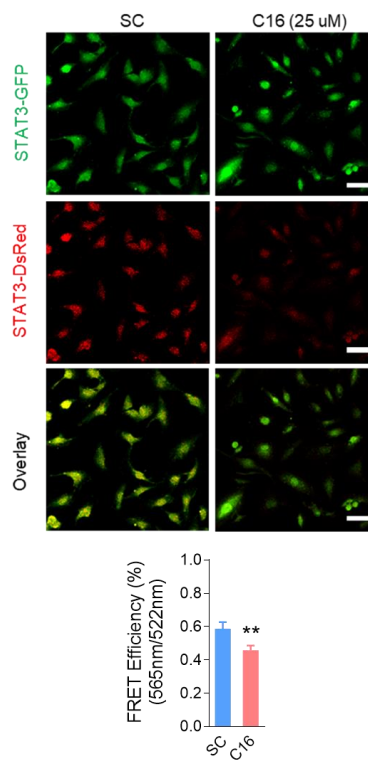

**Supplementary Fig. 8 Quantitative analysis of normalized FRET ratio in U251 cells (n=3, \*\*P < 0.01).** U251 cells were transiently transfected with the indicated vectors for 24 h and treated with C16 for another 2 h. Bars, 50 um.

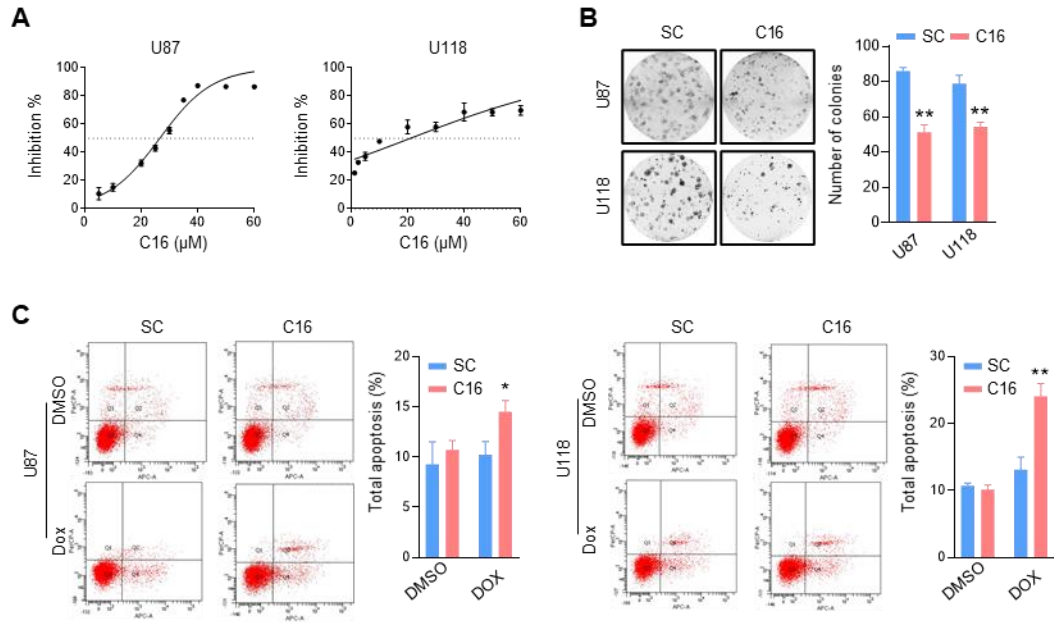

**Supplementary Fig. 9 C16 inhibits tumor growth and promotes chemosensitivity *in vitro*.**

- A.** C16 inhibited cell growth with concentration dependence in U87 and U118 cells (n=6).
- B.** Colony formation of cells treated with SC or C16 (left) and the accompanying statistical analysis (right; n=6, Student's *t*-test, \*\* $P < 0.01$ ).
- C.** Annexin V staining flow cytometry assay of cells simultaneously treated with Dox with SC or C16 for 48 h (n=3, Student's *t*-test, \* $P < 0.05$ , \*\* $P < 0.01$ ).

**Supplementary Table 1. Association between SHF expression and information of patients with GBM**

| Status                |         | SHF expression <sup>#</sup> , n |      | Total | P value* |
|-----------------------|---------|---------------------------------|------|-------|----------|
|                       |         | Low                             | High | n     |          |
| Gender                | Male    | 14                              | 15   | 29    | 0.793    |
|                       | Female  | 15                              | 14   | 29    |          |
| Age                   | <55 yrs | 9                               | 7    | 16    | 0.557    |
|                       | ≥55 yrs | 20                              | 22   | 42    |          |
| Survival <sup>§</sup> | ≤1 yrs  | 11                              | 10   | 21    | 0.462    |
|                       | 1-3 yrs | 12                              | 10   | 22    |          |
|                       | >3 yrs  | 4                               | 8    | 12    |          |

\*P values were analyzed by Chi-square test.

# According to the immunoreactive scores (IRS) from IHC of GBM tissue array: the cutoff between LOW and HIGH was set at the median IRS of GBM tissues.

§ The total number of patients used in survival analysis was 55, those without survival information were excluded.

**Supplementary Table 2. List of antibodies**

| Antigen                | Primary Antibody                              | Dilution                                       |
|------------------------|-----------------------------------------------|------------------------------------------------|
| SHF                    | Sigma; HPA046113; rabbit polyclonal           | 1:4000 for IHC/IF; 1:1000 for WB; 1:100 for IP |
| STAT3                  | Cell Signaling; 9139; mouse monoclonal        | 1:1000 for WB; 1:100 for ChIP; 1:600 for IF    |
| Phospho-STAT3 (Tyr705) | Cell Signaling; 9145; rabbit monoclonal       | 1:1000 for WB                                  |
| Phospho-STAT3 (Ser727) | Cell Signaling; 94994; rabbit monoclonal      | 1:1000 for WB                                  |
| Acetyl-STAT3 (Lys685)  | Cell Signaling; 2523; rabbit monoclonal       | 1:1000 for WB                                  |
| Histone H3             | Cell Signaling; 4620; rabbit monoclonal       | 1:50 for ChIP                                  |
| Normal Rabbit IgG      | Cell Signaling; 2729                          | 1:100 for IP or ChIP; 1:500 for IHC or IF      |
| Normal Mouse IgG       | ABCAM; ab188776                               | 1:100 for IP; 1:500 for IF                     |
| GAPDH                  | ThermoFisher; MA5-15738-1MG; mouse monoclonal | 1:2000 for WB                                  |
| β-tubulin              | Sigma; T5201; mouse monoclonal                | 1:200 for IF                                   |
| Flag-tag               | Abmart; M20008; mouse                         | 1:5000 for WB; 1:200 for IP                    |

|                                              |                                          |                             |
|----------------------------------------------|------------------------------------------|-----------------------------|
|                                              | monoclonal                               |                             |
| GFP-tag                                      | Abmart; M20004; mouse monoclonal         | 1:2000 for WB               |
| mCherry-tag                                  | GeneTex; GTX128508; rabbit polyclonal    | 1:2000 for WB; 1:50 for IP  |
| HA-tag                                       | Abcam; ab9110; rabbit monoclonal         | 1:5000 for WB; 1:50 for IP  |
| His-tag                                      | Proteintech; 66005; mouse monoclonal     | 1:5000 for WB               |
| Myc-tag                                      | Abmart; M20002; mouse monoclonal         | 1:5000 for WB; 1:500 for IP |
| GST                                          | ABCAM; ab19256; rabbit polyclonal        | 1:2000 for WB               |
| DNMT1                                        | ABCAM; ab19256; mouse monoclonal         | 1:2000 for WB               |
| DyLight 594 Phalloidin                       | Cell Signaling; 12877                    | 1:20 for IF                 |
| KRAS                                         | Proteintech; 12063; rabbit polyclonal    | 1:1000 for WB               |
| MEK1/2                                       | Proteintech; 11049; rabbit polyclonal    | 1:1000 for WB               |
| phospho-MEK1/2 (Ser217/221)                  | Cell Signaling; 9154; rabbit polyclonal  | 1:1000 for WB               |
| p44/42 MAPK (Erk1/2) (137F5)                 | Cell Signaling; 4695; rabbit monoclonal  | 1:1000 for WB               |
| phospho-p44/42 MAPK (Erk1/2) (Thr202/Tyr204) | Cell Signaling; 4370; rabbit monoclonal  | 1:1000 for WB               |
| Caspase 3                                    | Cell Signaling; 9662; rabbit polyclonal  | 1:1000 for WB               |
| Cleaved Caspase 3                            | Cell Signaling; 9664; rabbit polyclonal  | 1:1000 for WB               |
| Bcl-xL                                       | ABCAM; ab178844; rabbit monoclonal       | 1:1000 for WB               |
| STAT1                                        | Cell Signaling; 9172; rabbit polyclonal  | 1:1000 for WB               |
| STAT5                                        | Cell Signaling; 94205; rabbit monoclonal | 1:1000 for WB               |

**Supplementary Table 3. Primers used for qPCR**

| Gene       | Forward                | Reverse                |
|------------|------------------------|------------------------|
| <i>IL6</i> | AGACAGCCACTCACCTCTTCAG | TTCTGCCAGTGCCTCTTTGCTG |



|                |                                |                         |
|----------------|--------------------------------|-------------------------|
| <i>JAK2</i>    | CCAGATGGAAACTGTTTCGCTCAG       | GAGGTTGGTACATCAGAAACACC |
| <i>IKBKE</i>   | GGCTACAACGAGGAGCAGATTC         | GGACGCTTGATACTTCTGCACG  |
| <i>GAPDH</i>   | CAACTTTGGTATCGTGGAAAGGACT<br>C | AGGGATGATGTTCTGGAGAGCC  |
| <i>TCF12</i>   | TCAGTGCGATGTTTTCCCCA           | GGTTGACCACTTGTTCGCCA    |
| <i>DSCAM</i>   | CTCGGACTCAGGCAGCTATG           | GGTCCTCAGTTCCTGTCACG    |
| <i>MUM</i>     | GCTGGAGAAAGAGTGCCAGT           | GCTGGCCAGAAGGGGTATTT    |
| <i>CBFA2T2</i> | AGGCAATGGAAAGTTGGTCC           | GCACCATTCAGGGTAGGAGG    |

**Supplementary Table 4. Primers used for qPCR of ChIP**

| Gene         | Forward              | Reverse               |
|--------------|----------------------|-----------------------|
| <i>IL-6</i>  | ACACTTAGTGGAGGGCTTGG | AGCTTGCGTCTTGCTCCTAC  |
| <i>JAK2</i>  | GTCACAGCCGTTGTCTCCAC | GGCCTAGCGAATGTTTCTCCT |
| <i>IKBKE</i> | CCTCCAGCCTCCTAGGACAT | GCTCTTCAGAGACTGCTGGG  |

**Supplementary Table 5. Primers used for qMSP**

| Gene                           | Forward                          | Reverse                         |
|--------------------------------|----------------------------------|---------------------------------|
| <i>TCF12</i><br>(methylated)   | TAATAGAATTGATAAGTTGTAG<br>GGAACG | CGAAAACGAAACTAATTATCGAA         |
| <i>TCF12</i><br>(unmethylated) | AATAGAATTGATAAGTTGTAGG<br>GAAT   | CAACCAAAAACAAAATAATTAT<br>CAAAA |
| <i>DSCAM</i><br>(methylated)   | GGTATTYGGYGTTTAGAATG             | GCCCGCCTACTACCTAAATAC           |
| <i>DSCAM</i><br>(unmethylated) | GTAGGTGGAGAGAGTTGTAGA<br>TGT     | TACCCACCCACCTACTACCTAAA<br>TAC  |
| <i>MUM</i><br>(methylated)     | GTCGTAATAGCGGAGGATTC             | AAACCGACGCTCCTTAAAAAC           |
| <i>MUM</i><br>(unmethylated)   | GGTTGTAATAGTGGAGGATTT<br>G       | CAACACTCCTTAAAAACACACA<br>CAT   |
