# Supplementary material for: SHF Acts as a Novel Tumor Suppressor in Glioblastoma Multiforme by Disrupting STAT3 Dimerization
Source: PubMed Central journal article supplement (PMC9475553; doi:10.1002/advs.202200169), 2022-07-17
Supplement: ADVS-9-2200169-s012.pdf [file ADVS-9-2200169-s012.pdf]

**Supplementary Data 1. SHF expression and Clinical pathological information of GBM samples**

| <b>No.</b> | <b>Overall survival (1=death, 0=alive)</b> | <b>Disease specific survival in days</b> | <b>Gender</b> | <b>Age</b> | <b>IRS of SHF</b> |
|------------|--------------------------------------------|------------------------------------------|---------------|------------|-------------------|
| 1          | 1                                          | 199                                      | male          | 78         | 92.60             |
| 2          | 1                                          | 1172                                     | male          | 37         | 20.21             |
| 3          | 1                                          | 2605                                     | female        | 60         | 49.35             |
| 4          | 1                                          | 2360                                     | female        | 58         | 49.75             |
| 5          | 1                                          | 2240                                     | male          | 78         | 17.18             |
| 6          | 1                                          | 838                                      | male          | 57         | 12.29             |
| 7          | 1                                          | 1295                                     | female        | 61         | 81.91             |
| 8          | 1                                          | 838                                      | female        | 61         | 46.15             |
| 9          | 1                                          | 2695                                     | male          | 49         | 61.44             |
| 10         | 1                                          | 2240                                     | female        | 66         | 66.02             |
| 11         | 1                                          | 1295                                     | female        | 61         | 49.22             |
| 12         | 1                                          | 930                                      | male          | 71         | 133.03            |
| 13         | 1                                          | 899                                      | female        | 55         | 19.57             |
| 14         | 1                                          | 779                                      | male          | 47         | 36.43             |
| 15         | 1                                          | 1022                                     | male          | 50         | 37.46             |
| 16         | 1                                          | 382                                      | female        | 47         | 24.65             |
| 17         | 1                                          | 48                                       | female        | 67         | 35.53             |
| 18         | 0                                          | 756                                      | female        | 56         | 56.69             |
| 19         | 1                                          | 229                                      | male          | 63         | 24.98             |
| 20         | 0                                          | 330                                      | female        | 64         | 46.73             |
| 21         | 0                                          | 288                                      | female        | 69         | 37.48             |
| 22         | 0                                          | 104                                      | female        | 32         | 22.35             |
| 23         | 0                                          | 76                                       | male          | 58         | 38.96             |
| 24         | 0                                          | 72                                       | male          | 66         | 71.46             |
| 25         | 0                                          | 61                                       | female        | 56         | 36.17             |
| 26         | 1                                          | 3313                                     | male          | 56         | 101.27            |
| 27         | 0                                          | 44                                       | male          | 81         | 45.42             |
| 28         | 1                                          | 379                                      | male          | 58         | 22.60             |
| 29         | 1                                          | 791                                      | male          | 70         | 64.25             |
| 30         | 1                                          | 381                                      | female        | 42         | 112.62            |
| 31         | 0                                          | 874                                      | male          | 57         | 66.91             |
| 32         | 1                                          | 137                                      | female        | 69         | 33.47             |
| 33         | 0                                          | 916                                      | male          | 68         | 154.50            |
| 34         | 1                                          | 255                                      | female        | 37         | 61.84             |
| 35         | 1                                          | 598                                      | male          | 73         | 15.86             |
| 36         | 1                                          | 598                                      | male          | 73         | 37.63             |

|    |   |      |        |    |        |
|----|---|------|--------|----|--------|
| 37 | 1 | 177  | female | 60 | 17.02  |
| 38 | 1 | 205  | female | 50 | 81.27  |
| 39 | 1 | 63   | male   | 69 | 31.42  |
| 40 | 1 | 727  | female | 62 | 2.68   |
| 41 | 0 | 188  | female | 52 | 9.13   |
| 42 | 0 | 33   | male   | 48 | 30.54  |
| 43 | 1 | 295  | male   | 40 | 64.17  |
| 44 | 0 | 336  | female | 42 | 51.97  |
| 45 | 1 | 532  | female | 52 | 20.48  |
| 46 | 1 | 373  | female | 71 | 13.05  |
| 47 | 1 | 312  | male   | 57 | 102.44 |
| 48 | 1 | 1629 | male   | 78 | 24.04  |
| 49 | 1 | 838  | male   | 59 | 16.18  |
| 50 | 1 | 687  | male   | 60 | 40.86  |
| 51 | 1 | 657  | male   | 60 | 59.25  |
| 52 | 1 | 425  | male   | 54 | 31.85  |
| 53 | 1 | 2268 | female | 44 | 39.06  |
| 54 | 0 | 149  | female | 69 | 24.30  |
| 55 | 1 | 2360 | female | 58 | 17.91  |
| 56 |   |      | female | 71 | 107.83 |
| 57 |   |      | female | 71 | 29.54  |
| 58 |   |      | male   | 58 | 5.64   |
